# Supplementary material for: Salivary Biomarkers in COVID-19 Patients: Towards a Wide-Scale Test for Monitoring Disease Activity
Source: MDPI journal article supplement (doi:10.3390/jpm11050385), 2021-05-08
Supplement: s1 [file s1]

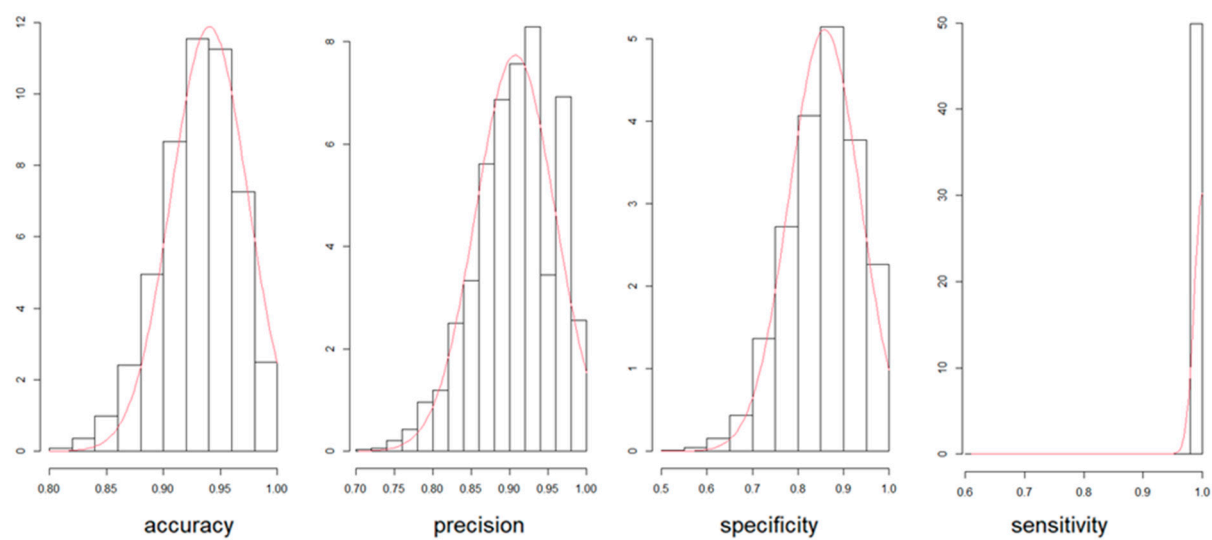

**Figure S1:** Gaussian fits of the distribution in figure 3 (A-D) used to computed mean accuracy, precision, specificity, and sensitivity together with the corresponding confidence intervals.

|                  |      | WITHOUT |        |        | WITH |         |         | p-value | WITHOUT |        |        | WITH |        |        | p-value |      |
|------------------|------|---------|--------|--------|------|---------|---------|---------|---------|--------|--------|------|--------|--------|---------|------|
|                  |      | n       | Median | IQR    | n    | Median  | IQR     |         | n       | Median | IQR    | n    | Median | IQR    |         |      |
| Diabetes         | k    | 26      | 2.49   | 2.98   | 3    | 0.64    | 0.93    | 0.15    | 22      | 1.85   | 2.64   | 7    | 3.82   | 0.90   | 0.1     | k    |
|                  | l    | 26      | 0.78   | 1.77   | 3    | 0.70    | 1.79    | 0.97    | 22      | 0.70   | 0.69   | 7    | 2.47   | 2.04   | 0.06    | l    |
|                  | k/l  | 26      | 1.75   | 1.94   | 3    | 0.50    | 0.26    | 0.04    | 22      | 1.45   | 2.10   | 7    | 1.35   | 2.15   | 0.46    | k/l  |
|                  | k+I  | 26      | 3.93   | 5.13   | 3    | 1.34    | 2.72    | 0.32    | 22      | 2.59   | 4.70   | 7    | 5.34   | 2.18   | 0.12    | k+I  |
|                  | IgA1 | 26      | 143.45 | 366.33 | 3    | 36.30   | 121.35  | 0.12    | 22      | 83.80  | 221.33 | 7    | 294.00 | 618.90 | 0.09    | IgA1 |
|                  | IgA2 | 26      | 121.65 | 254.45 | 3    | 34.10   | 78.60   | 0.15    | 22      | 83.70  | 214.78 | 7    | 249.10 | 435.10 | 0.16    | IgA2 |
| Hypertension     | k    | 23      | 2.38   | 3.02   | 6    | 1.38    | 2.11    | 0.13    | 22      | 2.09   | 2.56   | 7    | 3.82   | 8.10   | 0.61    | k    |
|                  | l    | 23      | 0.70   | 1.77   | 6    | 0.90    | 2.57    | 0.75    | 22      | 0.78   | 1.77   | 7    | 0.70   | 1.60   | 0.89    | l    |
|                  | k/l  | 23      | 1.96   | 2.03   | 6    | 0.57    | 0.43    | 0.02    | 22      | 1.45   | 2.04   | 7    | 1.12   | 3.37   | 0.70    | k/l  |
|                  | k+I  | 23      | 3.43   | 5.35   | 6    | 2.89    | 4.85    | 0.31    | 22      | 3.26   | 4.49   | 7    | 5.10   | 9.41   | 0.66    | k+I  |
|                  | IgA1 | 23      | 153.80 | 326.40 | 6    | 85.25   | 185.45  | 0.40    | 22      | 143.45 | 228.83 | 7    | 60.50  | 774.00 | 0.82    | IgA1 |
|                  | IgA2 | 23      | 124.50 | 246.25 | 6    | 82.00   | 121.68  | 0.45    | 22      | 136.70 | 214.05 | 7    | 45.70  | 360.95 | 0.26    | IgA2 |
| Obesity          | k    | 25      | 2.12   | 3.12   | 4    | 2.51    | 2.77    | 0.97    | 19      | 2.59   | 2.64   | 10   | 1.31   | 2.60   | 0.18    | k    |
|                  | l    | 25      | 0.70   | 1.77   | 4    | 0.90    | 0.77    | 0.81    | 19      | 1.17   | 2.25   | 10   | 0.70   | 0.29   | 0.14    | l    |
|                  | k/l  | 25      | 1.35   | 2.15   | 4    | 2.42    | 0.68    | 0.64    | 19      | 1.54   | 2.18   | 10   | 1.32   | 1.75   | 0.46    | k/l  |
|                  | k+I  | 25      | 3.43   | 5.09   | 4    | 3.40    | 3.54    | 0.97    | 19      | 5.10   | 4.85   | 10   | 2.01   | 2.90   | 0.13    | k+I  |
|                  | IgA1 | 25      | 153.80 | 415.70 | 4    | 83.10   | 81.33   | 0.64    | 19      | 232.10 | 602.40 | 10   | 85.25  | 107.03 | 0.15    | IgA1 |
|                  | IgA2 | 25      | 124.50 | 268.90 | 4    | 101.75  | 69.23   | 0.65    | 19      | 124.50 | 298.20 | 10   | 82.00  | 189.93 | 0.18    | IgA2 |
| Oncology history | k    | 27      | 2.05   | 2.97   | 2    | 8.82    | 4.72    | 0.08    | 8       | 2.09   | 2.16   | 21   | 2.38   | 3.28   | 0.85    | k    |
|                  | l    | 27      | 0.70   | 1.84   | 2    | 0.94    | 0.24    | 0.75    | 8       | 0.78   | 2.55   | 21   | 0.70   | 1.76   | 0.66    | l    |
|                  | k/l  | 27      | 1.35   | 1.92   | 2    | 11.42   | 7.92    | 0.04    | 8       | 1.90   | 1.94   | 21   | 1.35   | 2.17   | 0.90    | k/l  |
|                  | k+I  | 27      | 3.08   | 5.08   | 2    | 9.76    | 4.49    | 0.18    | 8       | 3.59   | 4.32   | 21   | 3.43   | 5.25   | 0.79    | k+I  |
|                  | IgA1 | 27      | 95.40  | 245.05 | 2    | 1564.65 | 1276.95 | 0.11    | 8       | 182.60 | 196.60 | 21   | 95.40  | 429.30 | 0.51    | IgA1 |
|                  | IgA2 | 27      | 118.80 | 221.15 | 2    | 200.85  | 155.15  | 0.90    | 8       | 164.65 | 155.73 | 21   | 97.60  | 243.00 | 0.30    | IgA2 |
| Heart disease    | k    | 25      | 2.38   | 3.12   | 4    | 1.89    | 0.83    | 0.55    | 18      | 1.85   | 3.09   | 11   | 3.35   | 2.14   | 0.21    | k    |
|                  | l    | 25      | 0.70   | 1.76   | 4    | 2.35    | 3.37    | 0.47    | 18      | 0.70   | 2.14   | 11   | 0.86   | 0.48   | 0.72    | l    |
|                  | k/l  | 25      | 1.54   | 1.96   | 4    | 0.78    | 0.67    | 0.15    | 18      | 1.24   | 1.80   | 11   | 3.07   | 2.23   | 0.03    | k/l  |
|                  | k+I  | 25      | 3.43   | 5.33   | 4    | 4.38    | 4.34    | 0.97    | 18      | 2.59   | 5.57   | 11   | 4.44   | 2.88   | 0.49    | k+I  |
|                  | IgA1 | 25      | 133.10 | 242.20 | 4    | 173.80  | 356.85  | 0.92    | 18      | 112.80 | 235.13 | 11   | 153.80 | 671.85 | 0.87    | IgA1 |
|                  | IgA2 | 25      | 118.80 | 227.20 | 4    | 139.00  | 212.63  | 0.93    | 18      | 136.70 | 214.18 | 11   | 105.90 | 253.85 | 0.71    | IgA2 |
| Fever at onset   | k    | 7       | 2.05   | 1.58   | 22   | 2.49    | 3.22    | 0.66    | 23      | 2.38   | 3.02   | 6    | 1.18   | 1.88   | 0.81    | k    |
|                  | l    | 7       | 0.70   | 1.04   | 22   | 0.90    | 1.77    | 0.76    | 23      | 1.09   | 1.84   | 6    | 0.70   | 0.12   | 0.72    | l    |
|                  | k/l  | 7       | 2.46   | 1.88   | 22   | 1.35    | 2.16    | 0.94    | 23      | 1.54   | 1.93   | 6    | 0.78   | 1.44   | 0.29    | k/l  |
|                  | k+I  | 7       | 2.75   | 3.45   | 22   | 3.94    | 5.37    | 0.70    | 23      | 4.44   | 5.35   | 6    | 1.88   | 2.73   | 0.99    | k+I  |
|                  | IgA1 | 7       | 133.10 | 170.65 | 22   | 124.60  | 435.15  | 0.94    | 23      | 153.80 | 326.40 | 6    | 96.80  | 165.00 | 0.96    | IgA1 |
|                  | IgA2 | 7       | 148.90 | 131.65 | 22   | 101.75  | 292.08  | 0.50    | 23      | 118.80 | 218.50 | 6    | 99.45  | 238.33 | 0.87    | IgA2 |
|                  |      | n       | Median | IQR    | n    | Median  | IQR     | p-value | n       | Median | IQR    | n    | Median | IQR    | p-value |      |
|                  |      | WITHOUT |        |        | WITH |         |         |         | WITHOUT |        |        | WITH |        |        |         |      |

**Table S1:** Effect of comorbidities, symptoms at onset, complications and smoke on selected salivary biomarker levels.
